# Supplementary material for: Irritability and Its Clinical Utility in Major Depressive Disorder: Prediction of Individual-Level Acute-Phase Outcomes Using Early Changes in Irritability and Depression Severity
Source: Atypon-hosted journal article supplement (doi:10.1176/appi.ajp.2018.18030355), 2019-03-29

**Supplementary Table 1. Baseline sociodemographic variables of participants of CO-MED trial and SAMS who were excluded from analyses with complete data**

|                                                          | CO-MED                               |                  |                                        |                       | SAMS                                 |                  |                                        |                       |
|----------------------------------------------------------|--------------------------------------|------------------|----------------------------------------|-----------------------|--------------------------------------|------------------|----------------------------------------|-----------------------|
|                                                          | Excluded from prediction of outcomes |                  | Comparison of included versus excluded |                       | Excluded from prediction of outcomes |                  | Comparison of included versus excluded |                       |
| Number                                                   | 233                                  |                  |                                        |                       | 103                                  |                  |                                        |                       |
| <b><u>Categorical variables</u></b>                      | <b><u>N</u></b>                      | <b><u>%</u></b>  | <b><u><math>\chi^2</math> (df)</u></b> | <b><u>p value</u></b> | <b><u>N</u></b>                      | <b><u>%</u></b>  | <b><u><math>\chi^2</math> (df)</u></b> | <b><u>p value</u></b> |
| Sex                                                      |                                      |                  | 0.59 (1)                               | 0.44                  |                                      |                  | 0.25 (1)                               | 0.61                  |
| Male                                                     | 70                                   | 30.0             |                                        |                       | 28                                   | 27.2             |                                        |                       |
| Female                                                   | 163                                  | 70.0             |                                        |                       | 75                                   | 72.8             |                                        |                       |
| Race                                                     |                                      |                  | 17.88 (2)                              | <0.001                |                                      |                  | 2.68 (2)                               | 0.26                  |
| White                                                    | 127                                  | 54.5             |                                        |                       | 65                                   | 63.1             |                                        |                       |
| Black                                                    | 84                                   | 36.1             |                                        |                       | 32                                   | 31.1             |                                        |                       |
| Other                                                    | 22                                   | 9.4              |                                        |                       | 6                                    | 5.8              |                                        |                       |
| Education <sup>@</sup>                                   |                                      |                  | 10.95 (2)                              | 0.004                 |                                      |                  | 2.65 (2)                               | 0.27                  |
| <12 years                                                | 48                                   | 21.4             |                                        |                       | 19                                   | 61.2             |                                        |                       |
| 12 –15 years                                             | 119                                  | 53.1             |                                        |                       | 63                                   | 20.4             |                                        |                       |
| >15 years                                                | 57                                   | 25.5             |                                        |                       | 21                                   | 18.4             |                                        |                       |
| Hispanic ethnicity                                       | 33                                   | 14.0             | 0.31 (1)                               | 0.58                  | 15                                   | 14.6             | 1.38 (1)                               | 0.24                  |
| Employed at baseline                                     | 104                                  | 44.4             | 3.90 (1)                               | 0.05                  | 58                                   | 56.3             | 0.51 (1)                               | 0.47                  |
| Onset of depression before age 18 years <sup>\$ %</sup>  | 104                                  | 45.0             | 0.03 (1)                               | 0.86                  | 44                                   | 43.6             | 3.53 (1)                               | 0.06                  |
| Chronic depression <sup>\$</sup>                         | 132                                  | 57.1             | 0.42 (1)                               | 0.52                  | 26                                   | 25.2             | 0.23 (1)                               | 0.63                  |
| Recurrent depression <sup>\$ *</sup>                     | 174                                  | 75.3             | 1.42 (1)                               | 0.23                  | 53                                   | 63.1             | 0.63 (1)                               | 0.43                  |
| <b><u>Continuous variables</u></b>                       | <b><u>Mean</u></b>                   | <b><u>SD</u></b> | <b><u>t (df)</u></b>                   | <b><u>p value</u></b> | <b><u>Mean</u></b>                   | <b><u>SD</u></b> | <b><u>t (df)</u></b>                   | <b><u>p value</u></b> |
| Mean age in years                                        | 40.6                                 | 13.3             | 3.05 (456)                             | 0.002                 | 39.0                                 | 14.4             | 2.07 (197)                             | 0.04                  |
| Mean depressive symptom severity (QIDS-C)                | 16.3                                 | 3.5              | -2.50 (461)                            | 0.013                 | 15.1                                 | 3.2              | -1.37 (219)                            | 0.17                  |
| Mean irritability severity (CAST-IRR) <sup>&amp; #</sup> | 17.6                                 | 3.9              | -1.43 (464)                            | 0.15                  | 15.7                                 | 4.9              | 0.68 (181)                             | 0.50                  |

<sup>@</sup> Missing values for N=9 in Combining Medications to Enhance Depression Outcomes (CO-MED) trial, <sup>#</sup> missing value for N=1 in CO-MED, <sup>\$</sup> missing values for N=2 in CO-MED, <sup>%</sup> missing values for N=2 in Suicide Assessment and Methodology Study (SAMS), <sup>\*</sup> missing values for N=19 in SAMS, and missing values for N=3 in SAMS. Irritability was measured with the 5-item irritability domain of Concise Associated Symptom Tracking scale (CAST-IRR). Depressive symptom severity was measured with 16-item Quick Inventory of Depressive Symptomatology Clinician-Rated version (QIDS-C)

Supplementary Figure 1. Change in irritability with antidepressant treatment from baseline to week-4 of CO-MED trial (N=664). Figure legend: Irritability was measured with 5-item irritability domain of the Concise Associated Symptom Tracking scale (CAST-IRR) in the Combining Medications to Enhance Depression Outcomes (CO-MED) trial. Changes in irritability was measured with repeated-measured mixed model analyses and the least square (LS) means at each visit from baseline to week-4 of CO-MED trial are presented here.

Supplementary Figure 1. Change in irritability with antidepressant treatment from baseline to week-4 of CO-MED trial (n=664)

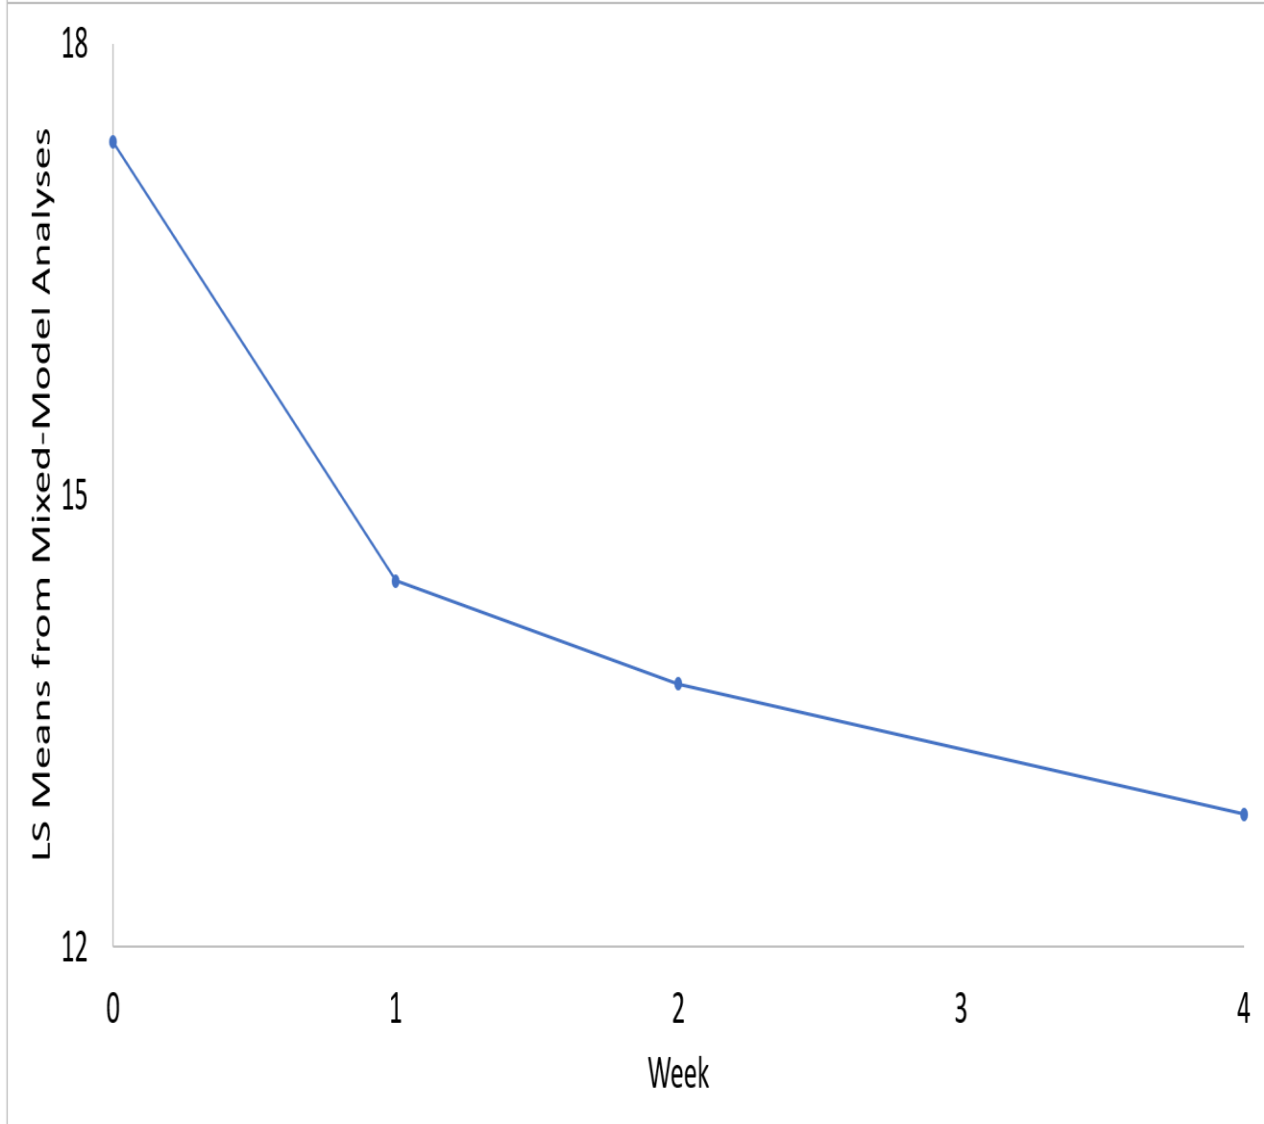

Supplementary Figure 2. Calibration plots of remission and no-meaningful-benefit predictive models in CO-MED trial and SAMS. Figure legend: CO-MED is Combining Medications to Enhance Depression Outcomes, SAMS is Suicide Assessment and Methodology Study, remission was ascribed if Quick Inventory of Depressive Symptomatology Clinician-Rated version (QIDS-C) at week 8 was  $\leq 5$ , and no-meaningful-benefit was ascribed if percent reduction in QIDS-C from baseline to week 8 was  $< 30\%$ .

Supplementary Figure 2. Calibration plots of remission and no-meaningful-benefit predictive models in CO-MED trial and SAMS

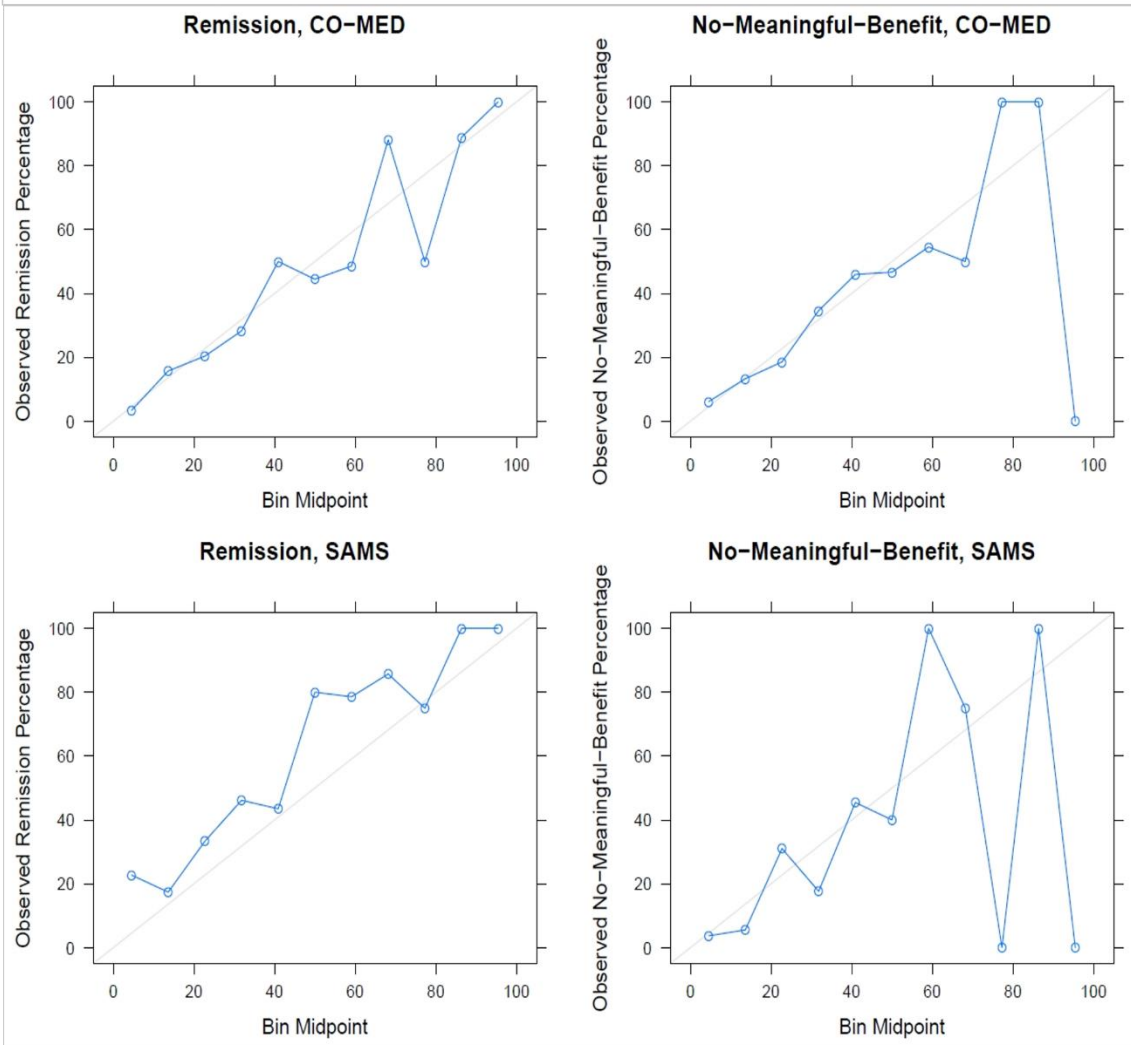

Supplement: appi.ajp.2018.18030355.ds001.pdf [file appi.ajp.2018.18030355.ds001.pdf]
